# Supplementary material for: Factors Associated with Occurrence of Atelectasis during Sedation for Imaging in Pediatric Patients: A Retrospective Single Center Cohort Study
Source: J Clin Med. 2021 Aug 16;10(16):3598. doi: 10.3390/jcm10163598 (PMC8397091; doi:10.3390/jcm10163598)
Supplement: Supplementary file 1 [file jcm-10-03598-s001.zip › jcm-1287602-supplementary.pdf]

**Table S1.** Quantitative analysis of atelectasis volume

| Group                         | Median atelectasis<br>volume per total lung<br>volume on initial images<br>(%) | Median atelectasis<br>volume per total lung<br>volume on final images<br>(%) | P-value* |
|-------------------------------|--------------------------------------------------------------------------------|------------------------------------------------------------------------------|----------|
| Propofol + O <sub>2</sub> (+) | 1.15 (0.2–2.0)                                                                 | 1.29 (0.8–4.1)                                                               | 0.242    |
| Propofol + O <sub>2</sub> (-) | 0.94 (0–0.9)                                                                   | 1.17 (0.9–1.3)                                                               | 0.401    |
| Dexmedetomidine               | 1.06 (0.4–1.7)                                                                 | 0.63 (0.3–1.2)                                                               | 0.310    |
| P-value†                      | 0.748                                                                          | 0.240                                                                        |          |

Data are presented as medians with interquartile ranges.

\* P-values of Wilcoxon signed rank test for comparison between initial and last images.

† P-values of Kruskal–Wallis test for comparison of the three groups.

**Table S2.** Logistic regression analysis of factors associated with occurrence of atelectasis in subgroup of patients not requiring supplemental oxygen administration (n = 53)

| Parameters             | Univariate |             |         | Multivariate |             |         |
|------------------------|------------|-------------|---------|--------------|-------------|---------|
|                        | Odds Ratio | 95% CI      | P-value | Odds Ratio   | 95% CI      | P-value |
| Age (per 1 month)      | 0.996      | 0.974–1.018 | 0.721   |              |             |         |
| Sex                    |            |             |         |              |             |         |
| Female                 | 1          |             |         |              |             |         |
| Male                   | 1.048      | 0.265–4.149 | 0.947   |              |             |         |
| Drug                   |            |             |         |              |             |         |
| Propofol               | 1          |             |         | 1            |             |         |
| Dexmedetomidine        | 0.536      | 0.134–2.149 | 0.379   | 0.501        | 0.094–2.665 | 0.418   |
| Induction time         | 0.977      | 0.856–1.114 | 0.729   | 1.011        | 0.866–1.181 | 0.886   |
| Scan time              | 1.010      | 0.945–1.079 | 0.767   |              |             |         |
| Use of adjuvant agents | 1.381      | 0.335–5.695 | 0.655   |              |             |         |

**Table S3.** Logistic regression analysis of factors associated with occurrence of atelectasis in subgroup of patients sedated with propofol (n = 57)

| Parameters                         | Univariate |              |         | Multivariate |              |         |
|------------------------------------|------------|--------------|---------|--------------|--------------|---------|
|                                    | Odds Ratio | 95% CI       | P-value | Odds Ratio   | 95% CI       | P-value |
| Age (per 1 month)                  | 1.006      | 0.994–1.019  | 0.307   |              |              |         |
| Sex                                |            |              |         |              |              |         |
| Female                             | 1          |              |         |              |              |         |
| Male                               | 0.914      | 0.322–2.598  | 0.866   |              |              |         |
| Supplemental oxygen administration | 3.937      | 1.182–13.113 | 0.026   | 3.957        | 1.185–13.218 | 0.025   |
| Induction time                     | 0.969      | 0.88–1.066   | 0.517   | 0.968        | 0.88–1.065   | 0.508   |
| Scan time                          | 1.015      | 0.974–1.059  | 0.472   |              |              |         |

|                        |       |             |       |
|------------------------|-------|-------------|-------|
| Use of adjuvant agents | 0.945 | 0.226–3.959 | 0.939 |
|------------------------|-------|-------------|-------|

---
